# Supplementary material for: Regional effects and local climate jointly shape the global distribution of sexual systems in woody flowering plants
Source: Copernicus journal article supplement (doi:10.5194/bg-21-2133-2024), 2024-04-29

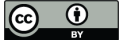

*Supplement of*

## **Regional effects and local climate jointly shape the global distribution of sexual systems in woody flowering plants**

**Minhua Zhang et al.**

*Correspondence to:* Fangliang He (fhe@ualberta.ca)

The copyright of individual parts of the supplement might differ from the article licence.

**Table S1.** Correlation among bioclimate factors across the 55 forest plots. Variables (in bold) with pairwise Pearson correlation coefficients >0.95 were excluded to avoid collinearity.

|       | MAT         | MAP   | PET   | <b>Bio1</b> | Bio2  | Bio3  | <b>Bio4</b>  | Bio5  | Bio6         | <b>Bio7</b>  | Bio8  | <b>Bio9</b> | Bio10 | <b>Bio11</b> | Bio12 | Bio13       | Bio14       | Bio15 | <b>Bio16</b> | <b>Bio17</b> | Bio18 | Bio19 |
|-------|-------------|-------|-------|-------------|-------|-------|--------------|-------|--------------|--------------|-------|-------------|-------|--------------|-------|-------------|-------------|-------|--------------|--------------|-------|-------|
| MAT   | 1.00        | 0.62  | 0.60  | <b>0.97</b> | -0.58 | 0.72  | -0.87        | 0.62  | 0.95         | -0.89        | 0.69  | 0.87        | 0.81  | 0.95         | 0.75  | 0.70        | 0.38        | -0.15 | 0.71         | 0.40         | 0.44  | 0.49  |
| MAP   | 0.62        | 1.00  | 0.26  | 0.62        | -0.63 | 0.50  | -0.60        | 0.22  | 0.65         | -0.67        | 0.43  | 0.58        | 0.46  | 0.63         | 0.83  | 0.71        | 0.45        | -0.14 | 0.76         | 0.51         | 0.58  | 0.61  |
| PET   | 0.60        | 0.26  | 1.00  | 0.71        | -0.03 | 0.60  | -0.62        | 0.67  | 0.65         | -0.54        | 0.39  | 0.73        | 0.63  | 0.70         | 0.37  | 0.42        | 0.06        | 0.19  | 0.40         | 0.10         | 0.07  | 0.32  |
| Bio1  | <b>0.97</b> | 0.62  | 0.71  | 1.00        | -0.54 | 0.73  | -0.89        | 0.69  | <b>0.97</b>  | -0.89        | 0.68  | 0.92        | 0.85  | <b>0.98</b>  | 0.73  | 0.69        | 0.34        | -0.08 | 0.70         | 0.37         | 0.42  | 0.47  |
| Bio2  | -0.58       | -0.63 | -0.03 | -0.54       | 1.00  | -0.17 | 0.47         | -0.08 | -0.59        | 0.64         | -0.48 | -0.42       | -0.47 | -0.53        | -0.67 | -0.66       | -0.30       | 0.17  | -0.66        | -0.34        | -0.65 | -0.25 |
| Bio3  | 0.72        | 0.50  | 0.60  | 0.73        | -0.17 | 1.00  | -0.84        | 0.33  | 0.78         | -0.78        | 0.37  | 0.78        | 0.41  | 0.80         | 0.55  | 0.39        | 0.38        | -0.18 | 0.41         | 0.41         | 0.05  | 0.67  |
| Bio4  | -0.87       | -0.60 | -0.62 | -0.89       | 0.47  | -0.84 | 1.00         | -0.35 | <b>-0.96</b> | <b>0.98</b>  | -0.41 | -0.94       | -0.52 | <b>-0.96</b> | -0.66 | -0.59       | -0.33       | 0.17  | -0.59        | -0.37        | -0.27 | -0.57 |
| Bio5  | 0.62        | 0.22  | 0.67  | 0.69        | -0.08 | 0.33  | -0.35        | 1.00  | 0.53         | -0.31        | 0.59  | 0.57        | 0.90  | 0.57         | 0.39  | 0.39        | 0.16        | 0.06  | 0.40         | 0.15         | 0.17  | 0.20  |
| Bio6  | 0.95        | 0.65  | 0.65  | <b>0.97</b> | -0.59 | 0.78  | <b>-0.96</b> | 0.53  | 1.00         | <b>-0.97</b> | 0.56  | <b>0.96</b> | 0.72  | <b>0.99</b>  | 0.75  | 0.68        | 0.37        | -0.17 | 0.69         | 0.41         | 0.38  | 0.55  |
| Bio7  | -0.89       | -0.67 | -0.54 | -0.89       | 0.64  | -0.78 | <b>0.98</b>  | -0.31 | <b>-0.97</b> | 1.00         | -0.46 | -0.91       | -0.55 | <b>-0.96</b> | -0.73 | -0.65       | -0.37       | 0.20  | -0.66        | -0.41        | -0.38 | -0.57 |
| Bio8  | 0.69        | 0.43  | 0.39  | 0.68        | -0.48 | 0.37  | -0.41        | 0.59  | 0.56         | -0.46        | 1.00  | 0.42        | 0.79  | 0.58         | 0.56  | 0.56        | 0.29        | 0.05  | 0.56         | 0.29         | 0.60  | 0.10  |
| Bio9  | 0.87        | 0.58  | 0.73  | 0.92        | -0.42 | 0.78  | -0.94        | 0.57  | <b>0.96</b>  | -0.91        | 0.42  | 1.00        | 0.66  | <b>0.96</b>  | 0.67  | 0.62        | 0.29        | -0.08 | 0.63         | 0.33         | 0.24  | 0.58  |
| Bio10 | 0.81        | 0.46  | 0.63  | 0.85        | -0.47 | 0.41  | -0.52        | 0.90  | 0.72         | -0.55        | 0.79  | 0.66        | 1.00  | 0.73         | 0.62  | 0.62        | 0.27        | 0.02  | 0.62         | 0.28         | 0.46  | 0.25  |
| Bio11 | 0.95        | 0.63  | 0.70  | <b>0.98</b> | -0.53 | 0.80  | <b>-0.96</b> | 0.57  | <b>0.99</b>  | <b>-0.96</b> | 0.58  | <b>0.96</b> | 0.73  | 1.00         | 0.72  | 0.66        | 0.35        | -0.13 | 0.67         | 0.38         | 0.36  | 0.53  |
| Bio12 | 0.75        | 0.83  | 0.37  | 0.73        | -0.67 | 0.55  | -0.66        | 0.39  | 0.75         | -0.73        | 0.56  | 0.67        | 0.62  | 0.72         | 1.00  | 0.87        | 0.67        | -0.21 | 0.90         | 0.71         | 0.68  | 0.65  |
| Bio13 | 0.70        | 0.71  | 0.42  | 0.69        | -0.66 | 0.39  | -0.59        | 0.39  | 0.68         | -0.65        | 0.56  | 0.62        | 0.62  | 0.66         | 0.87  | 1.00        | 0.30        | 0.21  | <b>0.98</b>  | 0.34         | 0.70  | 0.44  |
| Bio14 | 0.38        | 0.45  | 0.06  | 0.34        | -0.30 | 0.38  | -0.33        | 0.16  | 0.37         | -0.37        | 0.29  | 0.29        | 0.27  | 0.35         | 0.67  | 0.30        | 1.00        | -0.67 | 0.35         | <b>0.99</b>  | 0.43  | 0.46  |
| Bio15 | -0.15       | -0.14 | 0.19  | -0.08       | 0.17  | -0.18 | 0.17         | 0.06  | -0.17        | 0.20         | 0.05  | -0.08       | 0.02  | -0.13        | -0.21 | 0.21        | -0.67       | 1.00  | 0.16         | -0.67        | -0.01 | -0.27 |
| Bio16 | 0.71        | 0.76  | 0.40  | 0.70        | -0.66 | 0.41  | -0.59        | 0.40  | 0.69         | -0.66        | 0.56  | 0.63        | 0.62  | 0.67         | 0.90  | <b>0.98</b> | 0.35        | 0.16  | 1.00         | 0.40         | 0.71  | 0.51  |
| Bio17 | 0.40        | 0.51  | 0.10  | 0.37        | -0.34 | 0.41  | -0.37        | 0.15  | 0.41         | -0.41        | 0.29  | 0.33        | 0.28  | 0.38         | 0.71  | 0.34        | <b>0.99</b> | -0.67 | 0.40         | 1.00         | 0.45  | 0.51  |
| Bio18 | 0.44        | 0.58  | 0.07  | 0.42        | -0.65 | 0.05  | -0.27        | 0.17  | 0.38         | -0.38        | 0.60  | 0.24        | 0.46  | 0.36         | 0.68  | 0.70        | 0.43        | -0.01 | 0.71         | 0.45         | 1.00  | 0.03  |
| Bio19 | 0.49        | 0.61  | 0.32  | 0.47        | -0.25 | 0.67  | -0.57        | 0.20  | 0.55         | -0.57        | 0.10  | 0.58        | 0.25  | 0.53         | 0.65  | 0.44        | 0.46        | -0.27 | 0.51         | 0.51         | 0.03  | 1.00  |

**Table S2.** The variance inflation factors (VIFs) of variables were included in the full models. Variables with VIF>10 (in bold) were excluded except for two plot character variables (Number of species and Number of trees).

| Explanatory variables                       | Variance inflation factors (VIF) |                           |
|---------------------------------------------|----------------------------------|---------------------------|
|                                             | Proportion of species            | Proportion of individuals |
| Latitude                                    | <b>15.832</b>                    | <b>28.563</b>             |
| Longitude                                   | <b>22.900</b>                    | <b>108.820</b>            |
| Region                                      | 3.963                            | 6.228                     |
| Elevation                                   | 6.565                            | <b>11.413</b>             |
| Island                                      | 7.856                            | <b>11.397</b>             |
| Number of species                           | 46.251                           | 71.214                    |
| Number of stems                             | 50.495                           | 68.233                    |
| Area                                        | <b>17.281</b>                    | <b>23.811</b>             |
| Mean species age                            | 6.532                            | 6.976                     |
| MAT (Observed Mean Annual Temperature)      | <b>59.503</b>                    | <b>59.879</b>             |
| MAP (Observed Mean Annual Precipitation)    | 8.130                            | <b>10.375</b>             |
| Mean species age×MAP                        | 6.339                            | 6.746                     |
| PET (Potential Evapotranspiration)          | <b>17.035</b>                    | <b>20.671</b>             |
| BIO2 (Mean Diurnal Range)                   | <b>16.059</b>                    | <b>21.447</b>             |
| BIO3 (Isothermality)                        | <b>25.646</b>                    | <b>30.448</b>             |
| BIO5 (Max Temperature of Warmest Month)     | <b>43.546</b>                    | <b>65.928</b>             |
| BIO6 (Min Temperature of Coldest Month)     | <b>64.098</b>                    | <b>80.874</b>             |
| BIO8 (Mean Temperature of Wettest Quarter)  | <b>20.075</b>                    | <b>22.494</b>             |
| BIO10 (Mean Temperature of Warmest Quarter) | <b>52.460</b>                    | <b>82.824</b>             |
| BIO12 (Annual Precipitation)                | <b>33.850</b>                    | <b>54.377</b>             |
| BIO13 (Precipitation of Wettest Month)      | <b>21.750</b>                    | <b>40.514</b>             |
| BIO14 (Precipitation of Driest Month)       | <b>14.029</b>                    | <b>16.702</b>             |
| BIO15 (Precipitation Seasonality)           | <b>10.819</b>                    | <b>21.922</b>             |
| BIO18 (Precipitation of Warmest Quarter)    | 9.395                            | <b>16.641</b>             |
| BIO19 (Precipitation of Coldest Quarter)    | 7.322                            | <b>10.482</b>             |

**Table S3.** The results of multivariate multinomial logistic model for the proportion of dioecious, monoecious, and hermaphroditic individuals in woody flowering plants. Dioecy is set as the baseline. M and H represent monoecy and hermaphroditism respectively. The region effects were coded in reference to Tropical Africa. *P* values indicate the significance of the *z* test.  $\beta$ 's are the coefficients of the multinomial logistic regression model given in the main text.

| Explanatory variables   | Coefficient (SE) |                  | <i>P</i> (>  <i>z</i>  ) value |          |
|-------------------------|------------------|------------------|--------------------------------|----------|
|                         | M ( $\beta_2$ )  | H ( $\beta_3$ )  | M                              | H        |
| Intercept               | 1.712 (0.032)    | 1.630 (0.023)    | <2.2e-16                       | <2.2e-16 |
| Region   Europe         | 5.960 (0.098)    | 1.806 (0.100)    | <2.2e-16                       | <2.2e-16 |
| Region   Neotropical    | -0.250 (6.80e-3) | 0.228 (4.55e-3)  | <2.2e-16                       | <2.2e-16 |
| Region   North America  | -0.185 (8.62e-3) | -0.952 (7.87e-3) | <2.2e-16                       | <2.2e-16 |
| Region   Oceania        | -0.775 (7.37e-3) | -0.977 (4.95e-3) | <2.2e-16                       | <2.2e-16 |
| Region   Temperate Asia | -0.079 (4.64e-3) | -0.282 (3.50e-3) | <2.2e-16                       | <2.2e-16 |
| Region   Tropical Asia  | -0.237 (4.46e-3) | -0.058 (3.09e-3) | <2.2e-16                       | <2.2e-16 |
| Mean species age        | 1.142 (0.019)    | -0.980 (0.015)   | <2.2e-16                       | <2.2e-16 |
| Number of species       | -0.219 (3.29e-3) | -0.265 (2.18e-3) | <2.2e-16                       | <2.2e-16 |
| Number of trees         | -0.081 (2.78e-3) | 0.063 (2.02e-3)  | <2.2e-16                       | <2.2e-16 |
| Mean species age × MAP  | -3.122 (0.044)   | 3.120 (0.031)    | <2.2e-16                       | <2.2e-16 |

**Figure S1.** The relationships between the proportion of flowering plants with different sexual systems and latitude.

(a), (c) and (e) are for the proportion of species, and (b), (d), and (f) are for the proportion of the individual. D, M, and H represent dioecy, monoecy, and hermaphroditism, respectively. The blue is the multinomial logistic model that only includes latitude as the explanatory variable (no other variables are included). The red curves are the fitted proportions based on the best selected model, i.e., the model presented in Table 1 and S3 for species and individuals, respectively.  $R^2$  values associated with the models only including latitude are given in each panel.

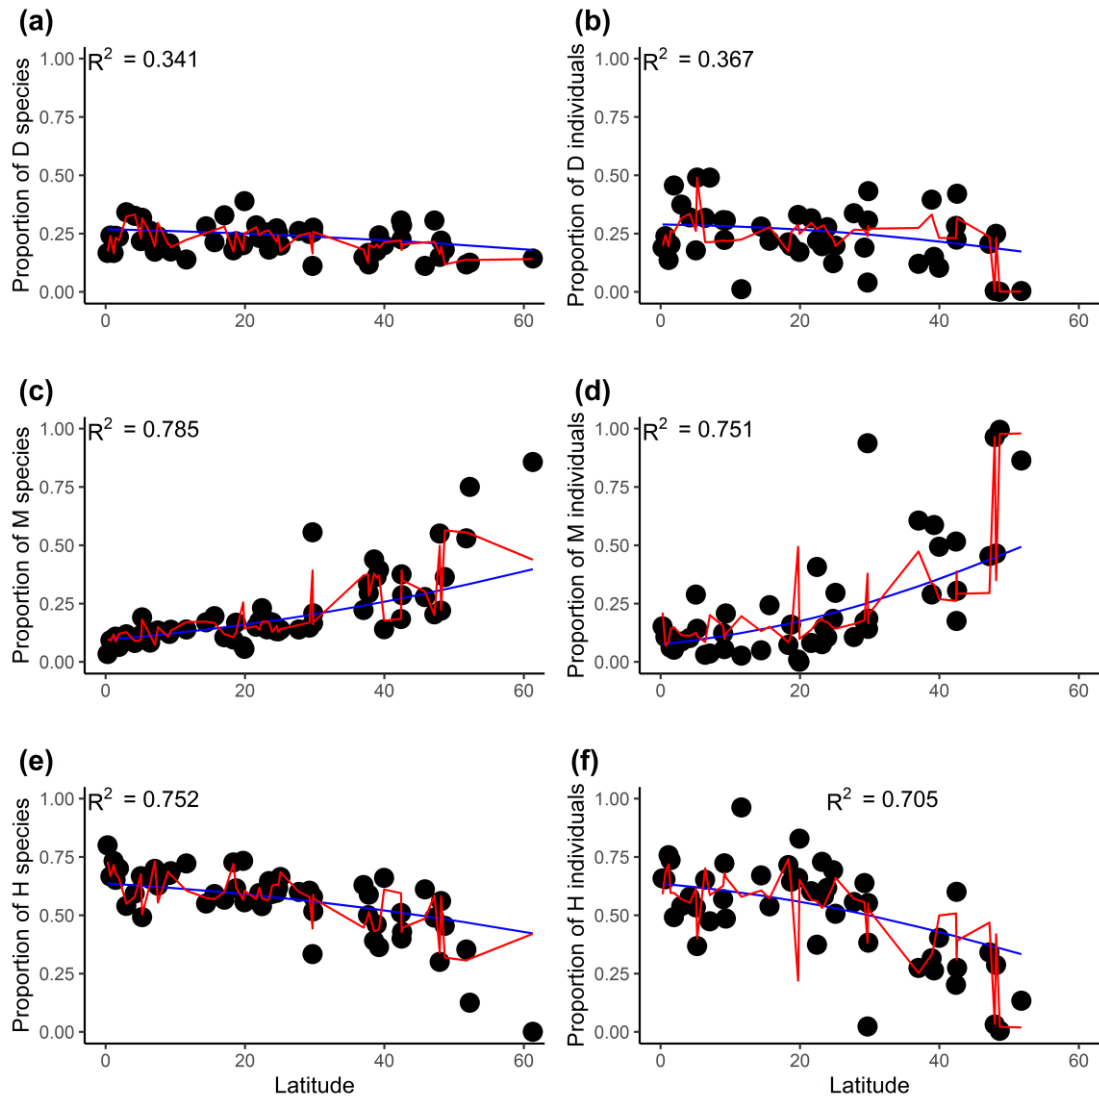

**Figure S2.** Phylogenetic distribution of sexual systems (D for dioecy, H for hermaphroditism, M for monoecy) in woody flowering plants of the 55 plots.

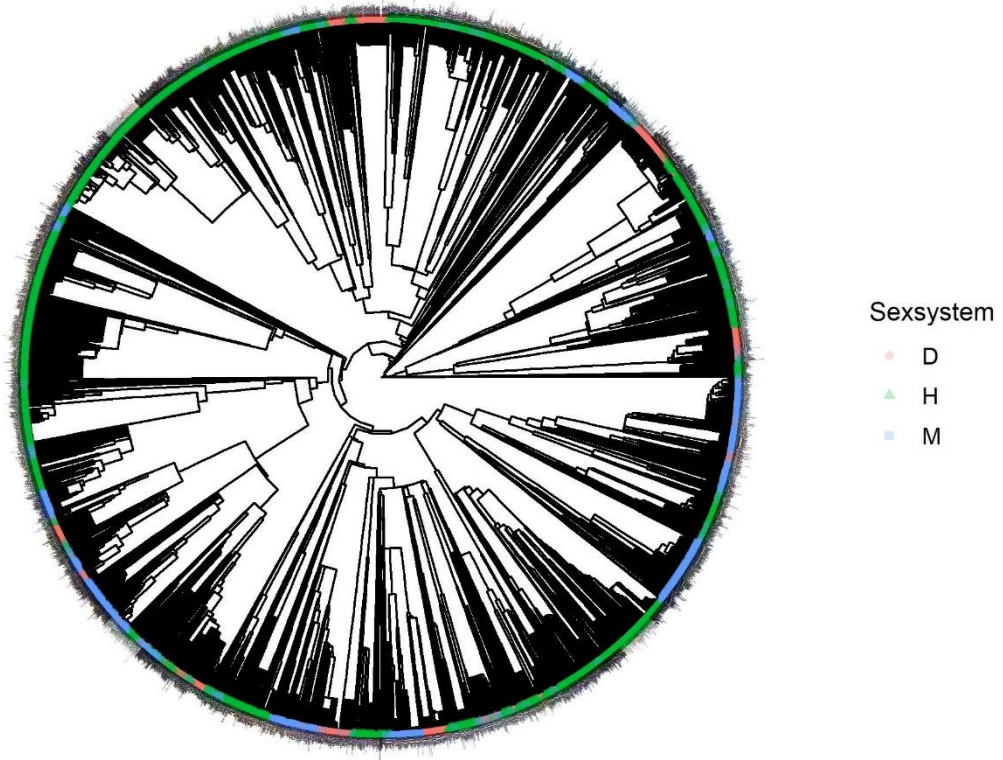

**Figure S3.** The relationships between the proportion of flowering plants with different sexual systems and precipitation of coldest quarter (BIO19). (a), (c) and (e) are for the proportion of species, and (b), (d), and (f) are for the proportion of the individual. D, M, and H represent dioecy, monoecy, and hermaphroditism, respectively. The blue line is the multinomial logistic model that only includes precipitation of coldest quarter as the explanatory variable (no other variables are included). The red curves are the fitted proportions based on the best selected model, i.e., the model presented in Table 1 and S3 for species and individuals, respectively.  $R^2$  values associated with models only including precipitation of coldest quarter are given in each panel.

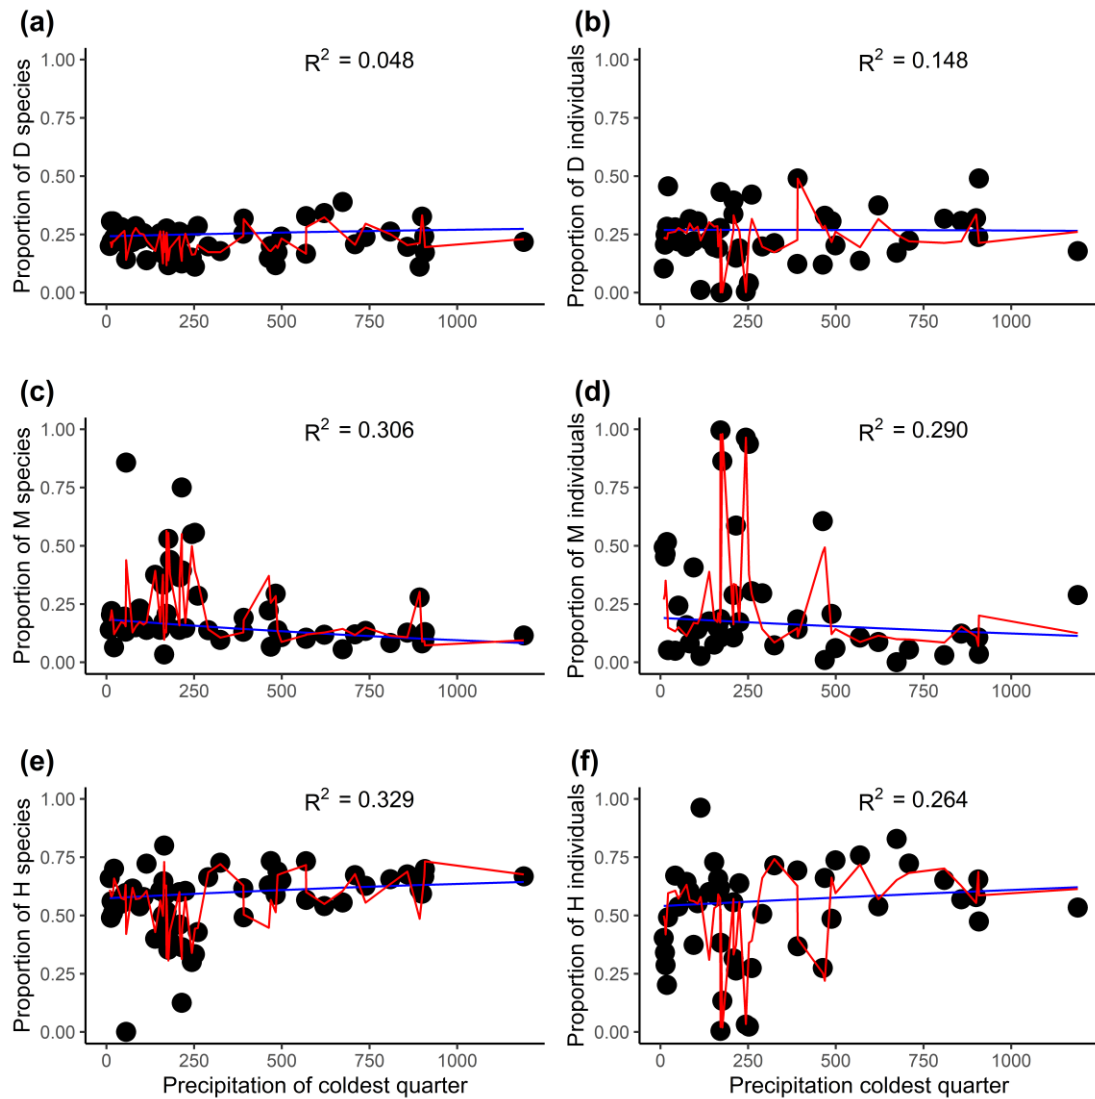

Supplement: Supplementary file 1 [file bg-21-2133-2024-supplement.pdf]
